# Supplementary material for: Pneumococcal infections in children with sickle cell disease before and after pneumococcal conjugate vaccines
Source: PubMed Central journal article supplement — Blood Adv. 2023 Sep 14;7(21):6751–61. doi: 10.1182/bloodadvances.2022009643 (PMC10660014; doi:10.1182/bloodadvances.2022009643), 2023-09-14
Supplement: BLOODA_ADV-2022-009643-mmc1.pdf [file BLOODA_ADV-2022-009643-mmc1.pdf]

2 Supplement material

3 Pneumococcal vaccines:

- 4 • PCV7 (Wyeth Pharmaceutical): serotypes 4, 6B, 9V, 14, 18C, 19F and 23F
- 5 • PCV9 (Wyeth Pharmaceutical): PCV7 plus serotypes 1 and 5
- 6 • PCV10 (GlaxoSmithKline, Serum Institute of India): PCV9 plus serotypes 7F
- 7 • PCV11 (Sanofi Pasteur): PCV10 plus serotype 3
- 8 • PCV13 (Wyeth Pharmaceutical/Pfizer): PCV11 serotypes plus 6A and 19A
- 9 • PCV15 (Merck Sharp & Dohme): PCV13 serotypes plus 22F and 33F
- 10 • PCV20 (Wyeth Pharmaceutical/Pfizer): PCV15 serotypes plus 8, 10A, 11A, 12F and 15B
- 11 • PCV21 (Sanofi-Pasteur, in development): PCV20 plus 9N
- 12 • PCV21 (Merck Sharp & Dohme, in development, V116):
  - 13 ○ Serotypes in PCV20 and PCV21: 3, 6A\*, 7F, 8, 10A, 11A, 12F, 15B\*, 19A, 22F, 33F
  - 14 ○ Serotypes not PCV20 : 9N, 15A, 16F, 17F, 20, 23A, 23B, 24F, 31, 35B
  - 15 ○ \*plus immune response against 6C, 15C.
- 16 • PPSV23 (Pneumovax23, Merck Sharp & Dohme)
  - 17 ○ PCV20 serotypes, plus 2, 9N, 17F and 20; minus 6A
  - 18 ○ PCV21 serotypes, plus 1, 2, 4, 5, 6B, 14, 18C, 19F, 23F, minus: 6A, 15A, 16F, 23B, 24F, 31, 35B
- 19 • For examples of other pneumococcal vaccines in development, see reference.<sup>70</sup>

20 (PCV: polysaccharide capsule conjugated to protein; PPSV: polysaccharide capsule)

21 Study population:

22 Before 1997, the initial 8 counties<sup>23</sup> GA-EIP catchment area included Clayton, Cobb, DeKalb, Douglas , Fulton , Gwinnett,  
23 Newton, and Rockdale counties. The additional 12 peripheral counties added in 1997 onward<sup>23</sup> included (Barrow, Bartow,  
24 Carroll, Cherokee, Coweta, Fayette, Forsyth, Henry, Paulding, Pickens, Spalding, and Walton counties.<sup>23</sup>

25 Population of children with SCD:

26 Data from both databases (1994-2002 and 2003-2018), were matched to hospital administrative electronic data to ensure  
27 that all encounters at CHOA for all patients with SCD were included in the analysis, whether or not a SCD ICD code was  
28 associated with the encounter.<sup>17</sup> Both SCD databases were also matched to the GA-EIP IPD database, using variables that  
29 included acrostic (first three letters of the last name and first two letters of the first name), date of birth, sex, last four digits  
30 of medical record number, and co-morbidity diagnoses in the GA-EIP IPD database (from 1/1/1994 until 7/31/2018). Clinical  
31 features of IPD cases identified by the GA-EIP, and/or by additional chart review<sup>13,17</sup> included history of oral penicillin  
32 prophylaxis, hydroxyurea administration, surgical splenectomy, bone marrow transplantation, meningitis and mortality.

33 Compared to the previous match,<sup>17</sup> 6 additional IPD were identified. Six cases of meningitis (including one in a child with  
34 HbSC) were identified by chart review separate from the GA-EIP prior to 2002.<sup>17</sup> Also one patient that died with an unknow  
35 serotype in GA-EIP, was typed separately at the CDC as part of the prior surveillance (19F),<sup>13</sup> and another child died from IPD  
36 was not identified as such in in the GAEIP. These were included in the analysis. One previously identified IPD not identified in  
37 the current match, was only included in vaccine effect analysis (serotype 10A).

#### 38 Pooled data:

39 the pooled data, IPD serotype in children with SCD was retrieved from 12,<sup>13,40,49,7150,72-78</sup> out of 216 (6%) studies containing  
40 search terms. Additional surveillance case-reports from outside of Atlanta were included.<sup>13,40</sup> Fourteen IPD episodes in two  
41 studies were excluded because only isolate serogroup was reported or serotype was incompletely characterized.<sup>71,73</sup> In the  
42 pooled data, 26% (46/177) of IPD episodes were with non-PCV13 serotypes: 36;<sup>71</sup> 15B, 18B, 18F;<sup>49</sup> 9N, 12F, 15B, 15C: 2, 18F,  
43 23A, 23B;<sup>13</sup> 22F, 23B (data from TVA);<sup>40</sup> 12F, 15C, 35B;<sup>50</sup> 13, 18F, 23B;<sup>72</sup> 23A: 3, 23B;<sup>73</sup> 15A, 15C;<sup>74</sup> 23B;<sup>75</sup> 15A, 15C: 2;<sup>76</sup> 15C,  
44 16F, 23A, 23B, 34, 37;<sup>77</sup> 15A: 2, 15BC: 5, 35B, 35F;<sup>78</sup> meningitis: 15C, meningitis/death: 18F;<sup>13</sup> death: 13A<sup>73</sup> death: 15A;<sup>76</sup>  
45 death: 15BC, 3.<sup>78</sup> IPD typed as 7BC or 15ACF were excluded.<sup>73</sup> Children with IPD were from the USA: 32 (70%),<sup>13,40,49,50,73-77</sup>  
46 UK: 10 (22%);<sup>78</sup> Kenya: 3 (7%);<sup>72</sup> Jamaica: 1 (2%);<sup>71</sup> and included HbSS: 23 (50%); HbSC: 22(49%); HbSbeta thalassemia 0: 1  
47 (2%); IPD in children with SCD from the current study were excluded from the pooled data. Non-PCV13 serotypes  
48 distribution of pooled data was not significantly different from the present study (p=0.1912). Because of limited data on IPD  
49 serotype in children with SCD in Africa, a study of pneumococcal nasopharyngeal carriage in patients with SCD from Ghana  
50 after introduction of pneumococcal conjugate vaccines (PCV10, PCV13) was examined.<sup>41</sup> Serotype was characterized in 94%  
51 (67/71) of samples, 60% (40) of which were non-PCV13 serotypes.<sup>41</sup> Non-PCV13 nasopharyngeal carriage in patients from

52 Ghana serotype distribution was significantly different from IPD serotype distribution in Atlanta or in the pooled IPD data,  
53  $p < 0.0001$ .

1 Note for Table 5: Before 2000 IPD in children were significantly more likely to be resistant to penicillin compared to the reference population but not  
 2 after 2009. Changes in adherence to penicillin prophylaxis may explain this trend.<sup>12</sup>

3

4 Table 5: IPD Minimal inhibitory concentration (MIC) to penicillin frequencies in children with SCD (HbSS/SC) ages 0-9 years compared to reference  
 5 population, with relative risk (RR).

| MIC<br>μg/mL | Pre-PCV period<br>1994 - 1999 |            |                      | PCV7 period<br>2000 - 2009 |             |                      | PCV13 period<br>2010 - 2018 |            |                      |
|--------------|-------------------------------|------------|----------------------|----------------------------|-------------|----------------------|-----------------------------|------------|----------------------|
|              | Reference                     | HbSS/SC    | RR (95 % CI), p      | Reference                  | HbSS/SC     | RR (95 % CI), p      | Reference                   | HbSS/SC    | RR (95 % CI), p      |
| <=0.06       | 513 (60.8%)                   | 18 (41.9%) | 0.7 (0.5,1.0), 0.016 | 284 (55.30%)               | 14 (41.20%) | 0.7 (0.5,1.1), 0.154 | 89 (51.70%)                 | 9 (52.90%) | 1.0 (0.6,1.6), 1.000 |
| 0.12-1       | 181 (21.4%)                   | 11 (25.6%) | 1.2 (0.7,2.0), 0.568 | 97 (18.90%)                | 11 (32.40%) | 1.7 (1.0,2.9), 0.073 | 39 (22.70%)                 | 6 (35.30%) | 1.6 (0.8,3.1), 0.244 |
| >=2          | 150 (18%)                     | 14 (32.6%) | 1.8 (1.2,2.9), 0.024 | 133 (26%)                  | 9 (26.50%)  | 1.0 (0.6,1.8), 1.000 | 44 (26%)                    | 2 (11.80%) | 0.5 (0.1,1.7), 0.252 |
| <b>Total</b> | 844 (100%)                    | 43 (100%)  |                      | 514 (100%)                 | 34 (100%)   |                      | 172 (100%)                  | 17 (100%)  |                      |

6 IPD: invasive pneumococcal infection MIC: minimal inhibitory concentration; Hb: hemoglobin; RR: relative risk; CI: confidence interval.

Note for Table 6: Indirect-cohort effect analysis, when indicated, analysis assumed that PPSV23 not affective after three years.<sup>45</sup>

Table 6. Indirect-cohort effect\* of PPSV23 vaccination on non-PCV13 PPSV23 related isolates (including 15A, 15C) in children with SCD with sensitivity analysis.

| Analysis                    | Age (years) | IPD occurrence after PPSV23 | Not vaccinated, n (%) |                            | Vaccinated, n (%) |                            | Effect (95 % CI), p value |                         |
|-----------------------------|-------------|-----------------------------|-----------------------|----------------------------|-------------------|----------------------------|---------------------------|-------------------------|
|                             |             |                             | Total                 | Serotype covered in PPSV23 | Total             | Serotype covered in PPSV23 | Unadjusted                | Adjusted                |
| <b>Main effect</b>          | <b>0-9</b>  | <b>&lt; 3 years</b>         | 21                    | 17 (81.0%)                 | 13                | 5 (38.5%)                  | 85.3 (30.0,96.9), 0.025   | 92.4 (40.8,99.0), 0.014 |
| <b>Sensitivity analysis</b> |             | <b>Any time</b>             | 17                    | 14 (82.4%)                 | 17                | 8 (47.1%)                  | 81.0 (8.5,96.0), 0.071    | 89.6 (-3.4,98.9), 0.053 |
|                             | <b>2-9</b>  | <b>&lt; 3 years</b>         | 14                    | 12 (85.7%)                 | 13                | 5 (38.5%)                  | 89.6 (32.6,98.4), 0.018   | 93.8 (37.8,99.4), 0.018 |
|                             |             | <b>Any time</b>             | 10                    | 9 (90.0%)                  | 17                | 8 (47.1%)                  | 90.1 (3.9,99.0), 0.042    | 89.6 (-3.5,99.0), 0.053 |

CI: confidence interval; analysis includes HbSS and HbSC; See further details in supplement. 15A<sup>35</sup> and 15C<sup>35,36</sup> was assumed to be covered in PPSV23; among children included in this analysis, 79% (27/34) of children were two years or older, and 26% (9/34) were on hydroxyurea. No significant effect of age, hydroxyurea and no significant interactions were noted in adjusted models. Models with children 0-9 years old were adjusted for age (0-2 vs. >two years) and hydroxyurea use (yes/no); those with children 2-9 years old adjusted for hydroxyurea use only. Three IPD with unknow PPSV23 vaccine history were excluded. Three Non-PCV13 IPD with unknow PPSV23 status were excluded.

1 Table 7: IPD incidence rates previously published among children with SCD

| Study                | Arm        | Hb  | Year            | Age, years | (n/per-yrs.), n/1000 per-yrs | Study                   | Arm                  | Hb    | Years | Age, yrs        | (n/per-yrs), n/1000 per-yrs |            |
|----------------------|------------|-----|-----------------|------------|------------------------------|-------------------------|----------------------|-------|-------|-----------------|-----------------------------|------------|
| Miami <sup>7</sup>   |            | SS  | 58-68           | <2         | (10/68.7), 145.6             | 8 centers <sup>13</sup> |                      | SS    | 97-99 | <1              | (4/221), 18.1               |            |
|                      |            | SS  | 58-68           | 2-3        | (9/115.7), 77.8              |                         |                      | SS    | 97-99 | 1               | (23/363), 63.4              |            |
|                      |            | SS  | 58-68           | 4-9        | (1/270.7), 3.7               |                         |                      | SS    | 97-99 | 2               | (13/355), 36.6              |            |
|                      |            | SS  | 58-68           | 10-19      | (1/179.7), 5.6               |                         |                      | SS    | 97-99 | 3-4             | (10/688), 14.5              |            |
|                      |            | SS  | 58-68           | 20-29      | (0/146.0), 0                 |                         |                      | SS    | 97-99 | 0-4             | (50/1627), 30.7             |            |
|                      |            | SS  | 58-68           | 30+        | (0/83.1), 0                  |                         |                      | SS    | 97-99 | 5-10            | (18/1958), 9.2              |            |
| LAC-USC <sup>4</sup> |            | SS  | <72             | 0-5        | (29/634), 45.7               |                         |                      | SS    | 97-99 | 0-10            | (68/3585), 19.0             |            |
|                      | IV abx     | SS  | >=72            | 0-5        | (17/147), 115.6              |                         |                      | SC    | 97-99 | 0-4             | (6/445), 13.5               |            |
| CSSCD <sup>79</sup>  |            | SS  | 79-85           | <1         | (12/188), 63.8               |                         | TN/ABC <sup>50</sup> |       | SC    | 97-99           | 5-10                        | (0/625), 0 |
|                      |            | SS  | 79-85           | 1          | (17/268), 63.4               |                         |                      |       | SCD   | 95-99           | <2                          | 36.3       |
|                      |            | SS  | 79-85           | 2          | (17/296), 57.4               |                         |                      |       | SCD   | 95-99           | <5                          | 20.4       |
|                      |            | SS  | 79-85           | 3          | (3/334), 9.0                 |                         |                      |       | SCD   | 95-99           | >=5                         | 1.6        |
|                      |            | SS  | 79-85           | 4          | (5/346), 14.5                |                         |                      |       | SCD   | 2000            | <2                          | 10.8       |
|                      |            | SS  | 79-85           | 5          | (4/345), 11.6                |                         |                      | SCD   | 2000  | <5              | 30.1                        |            |
| PROPS <sup>5</sup>   | Placebo    | SS  | 83-85           | <1         | (3/14.9), 201.3              |                         |                      | SCD   | 2000  | >=5             | 1.7                         |            |
|                      |            | SS  | 83-85           | 1          | (4/43.8), 91.3               |                         |                      | SCD   | 01-04 | <2              | 3.4                         |            |
|                      |            | SS  | 83-85           | 2          | (5/46.5), 107.5              |                         |                      | SCD   | 01-04 | <5              | 1.3                         |            |
|                      |            | SS  | 83-85           | 3          | (1/27.6), 36.2               |                         |                      | SCD   | 01-04 | >=5             | 1                           |            |
|                      |            | SS  | 83-85           | 0-3        | (13/132.8), 97.9             | GA/ABC <sup>17</sup>    | SS/SC                | 95-99 | 0-10  | (44/2543), 17.3 |                             |            |
|                      | Penicillin | SS  | 83-85           | <1         | (0/12.2), 0                  |                         |                      | SS/SC | 2000  | 0-10            | (8/573), 14.0               |            |
|                      |            | SS  | 83-85           | 1          | (1/45.9), 21.8               |                         |                      | SS/SC | 2001  | 0-10            | (4/578), 6.9                |            |
|                      |            | SS  | 83-85           | 2          | (0/48.2), 0                  |                         |                      | SS/SC | 2002  | 0-10            | (2/515), 3.9                |            |
|                      |            | SS  | 83-85           | 3          | (1/29.8), 33.6               | USA/ABC <sup>18</sup>   | SCD                  | 98-99 | 0-4   | 22.7            |                             |            |
| SS                   | 83-85      | 0-3 | (2/136.1), 14.7 |            | SCD                          |                         | 98-99                | 5-17  | 3.0   |                 |                             |            |
| PROPS2 <sup>10</sup> | Placebo    | SS  | 88-93           | 4.7-8      | (4/597), 6.7                 |                         |                      | SCD   | 00-04 | 0-4             | 5.9                         |            |
|                      |            | SS  | 88-93           | 4.7-8      | (2/606), 3.3                 |                         |                      | SCD   | 00-04 | 5-17            | 2.9                         |            |
| PA/VA <sup>49</sup>  |            | SS  | 92-98           | <5         | (30 /1232 ), 24.4            |                         |                      | SCD   | 05-09 | 0-4             | 5.4                         |            |
|                      |            | SS  | 92-98           | 5-21       | (10 /2876 ), 3.5             |                         | SCD                  | 05-09 | 5-17  | 2.2             |                             |            |
|                      |            | SC  | 92-98           | <5         | (7 /533), 13.1               |                         |                      |       |       |                 |                             |            |
|                      |            | SC  | 92-98           | 5-21       | (0/1244), 0                  |                         |                      |       |       |                 |                             |            |

Hb: hemoglobin, yrs: years; per: person; abx: antibiotics

Table 8: Non-PCV13 IPD in children with SCD and IPD, serotype coverage by PPSV23, PCV15, PCV20 and PCV21/V116.

| Clinical isolate data sources |                     | PPSV23 |     | PPSV23* |     | PCV15 |    | PCV20 |     | PCV21 |     | Total |      |
|-------------------------------|---------------------|--------|-----|---------|-----|-------|----|-------|-----|-------|-----|-------|------|
|                               |                     | n      | %   | n       | %   | n     | %  | n     | %   | n     | %   | n     | %    |
| Ghana <sup>41</sup>           | Nasopharyngeal (NP) | 9      | 22% | 14      | 34% | 0     | 0% | 11    | 27% | 24    | 60% | 40    | 100% |
| All isolates                  | IPD**+NP            | 27     | 22% | 60      | 49% | 8     | 7% | 48    | 39% | 95    | 77% | 123   | 100% |

Serotype 15C assumed covered in PCV20,<sup>37</sup> 6C and 15C in PCV21.<sup>35</sup>

\*Vaccine related serotype 15A<sup>35</sup> and 15C<sup>35,36</sup> assumed to be covered in PPSV23.

\*\* : IPD serotype data in children with SCD data from the present study and following references.<sup>13,40,49,7150,72-78</sup>
